# Supplementary material for: Let-7a Downregulation Accompanied by KRAS Mutation Is Predictive of Lung Cancer Onset in Cigarette Smoke–Exposed Mice
Source: MDPI journal article supplement (doi:10.3390/ijms241411778), 2023-07-21
Supplement: s1 [file s1]

## LET-7a-1 MOUSE PROMOTER

(da <http://www.nature.com/cmi/journal/v11/n1/full/cmi201351a.html>)

### Genomic sequence

chr13:48,538,171-48,539,472

TGGTAATCAGCCCCAACCTGAAACTGGGCCTCTGGGCACGGGGGATTTAGATATACTATTTTCAGGATCACTAACTTGAGTCC  
AATACTAACTTAACTTGTATTTGATGATGGCTCAAATTCCTTAGTGAATTATTAACTTAAAAAGTAGCTTTGCCTTTTCACTA  
TTCTCAACAACAGTCTATGAGATTCTAGTTTGTGTACATCCTTGCTAGAGCTTACTAATATCTTAGAAATGTTTGTGTGTGGT  
AGTCAGAGGATGACTTGTGA AAATCAGCTCTCCTCACCATGT SGATCCTGAAGATTGAATT TAC/TGCTTTCAGGCTTGGC/T  
GATAGGCAACCTTATTCCCTGAATATATATCTCTAGTCCTCATTACCTTTTTTGATGGATAGCTTTAAT SGATGTGTGTGTGTC  
CTGTTTTGGGATA GGTATATTCATAATGACTAAAGAATGATAATTTAGATCTTCTGTACTTATTGGGTATTTGTGTTTATGA  
GCCATATCGTCTCTGCTTCTAGATCAGTAGCTGTCTCAGCTCTGGTAAATACCTCTTGCCTGGTTTTTGTTTTTTGAGATTGG  
GTTTTAATTTTGTAGCTTGGTTTGGCCTCAAATTTACAGCAGTCCTCTTGTCCCAACCTCCCTGGTGCTCTTAATGAAAATCT  
GTTGACCTTGAATATGGCTTTATTTTTTGAAGTGTAACTTACATGACATTGAATCAATATGTTCTTGCTTATCTTTGTAATCT  
TTACTATTAGGTCACATACATAATTCATTTGTCTCATGAACATCTTTTCCTACTCTTTGATAATTTACGTATATTTAATGTGC  
CCATAATTTTGGCTACGATATCACACACCAGCTATAAACTTTTCATTTGGTCATTTTCATACTGGTACTCTGGGAAGTAGGTTTT  
TGGATTGGGGACATTTAAGCTTCAGTATTAGACAGTGGTAAGAATGTAATTTCTAGATCTTATAACATATTGAATTAGAGGCT  
TATAGCCAGGTGTATCATATAATACAATGAAACTACAATATAGGTCATATATGTAAGTGTTCAGTTAACTTCATGTTCAAG  
TTAAAGTAGTGAAAACTAATATTTTCTTTTCCCTCATTACACAGGAAACCGGAATTACAAAGGAGAACGGCTTCCTGTGATG  
CTCAGCTGTGATTACTTTCAACATTCACCCTGGATGTTCTCTT CACTGTGGGATGAGGTAGTAGGTTGTATAGTTTTAGGGTC  
ACACCCACCACTGGGAGATAACTATACAATCTACTGTCTTTCCTAAGGTGATGGAAAAGT

### Bisulfite converted sequence

TGGTAATTAGTTTTTAATTTGAAATTGGGTTTTTGGGTAC/TG GGGGATTTAGATATATTATTTTAGGATTATTAATTTGAGT  
TTAATATTAATTTAAATTTGTATTTGATGATGGTTTAAATTTTTAGTGAATTATTAAATTTAAAAAGTAGTTTTGTTTTTTTAT  
TATTTTAAATAAGTTTATGAGATTTTAGTTTGTGTATATTTTGTAGAGTTTATTAATATTTTAGAAATGTTTGTGTGTG  
GTAGTTAGAGGATGATTTGTGA AAATTAGTTTTTTTTATTATGT SGATTTTGAAGATTGAATT TAC/TGTTTTTAGGTTTGG  
C/TGATAGGTAATTTTATTTTTTGAATATATATTTTAGTTTTATTATTTTTTTTGTATGGATAGTTTAAATGG ATGTGTGT  
GTTTTGTTTTGGATA GGTATATTTATAATGATTAAGAATGATAATTTAGATTTTTTTTGTATTTATTGGGTATTTGTGTTTA  
TGAGTTATATC/TGTTTTTGTTTTTAGATTAGTAGTTGTTTTAGTTTTGGTAAATATTTTTTGTTTGGTTTTTGTTTTTTGTG  
ATTGGGTTTTTAATTTTGTAGTTTGGTTTGGTTTTTAAATTTATAGTAGTTTTTTTTGTTTTAATTTTTTTGGTGTTTTTAATGAA  
AATTTGTTGATTTTGAATATGGTTTTATTTTTTGAATTGTAATTTATATGATATTGAATTAATATGTTTTGTTTATTTTGT  
AATTTTATTATTAGGTTATTATATAATTTATTTGTTTTATGAATATTTTTTTTTTATTTTTTGTATAATTTAC/TGTATATTT  
AATGTGTTTATAATTTTGGTTAC/TGATATTATATATTAGTTATAAATTTTTATTTGGTTATTTTATATTGGTATTTTGGGAA  
TTAGGTTTTTGGATTGGGGATATTTAAGTTTTAGTATTAGATAGTGGTAAGAATGTAATTTTTAGATTTTATAATATATTGAA  
TTAGAGGTTTATAGTTTAGGTGTATTA TATAATATAATGAAATTATAATATAGGTTATATGTAATTGTTTAGTTAAATTTTT  
ATGTTTAAGTTAAAGTAGTGAAAATTTAATA TTTTTTTTTTTTTTATTATATAGGAAATC/TGGAATTATAAAGGAGAAC/TG  
GTTTTTGTGATGTTAGTTGTGATTATTTTTAATATTTATTTTGGATGTTTTTTTATTGTGGGATGAGGTAGTAGGTTGTA  
TAGTTTTAGGGTTATATTTATTATTGGGAGATAATTATATAATTTATTGTTTTTTTTTAAGGTGATGGAAAAGT

### Pcr primers

Let7 F1: TGGTAGTTAGAGGATGATTTGTGA

Let7 RV1: Bio- TATCCAAAACAAAACAACACACAT

PCR: 179bp

**Sequencing primer:**

Let7 Seq1: GGATTTTGAAGATTGAATT

PCR: 179bp

| Temperature | Time | Ciclyes |
|-------------|------|---------|
| 95°C        | 5′   | 1       |
| 95°C        | 30″  | 45      |
| 52°C        | 30″  |         |
| 72°C        | 30″  |         |
| 72°C        | 5′   | 1       |
| 6°C         | ∞    | 1       |

| Reagents     | Volume (μl) |
|--------------|-------------|
| H2O          | 13          |
| HotStart Mix | 25          |
| Fw Primer    | 1           |
| Rv Primer R  | 1           |
| DNA          | 10          |
